# Supplementary material for: The spreading of the invasive sacred ibis in Italy
Source: PubMed Central journal article supplement (PMC7794294; doi:10.1038/s41598-020-79137-w), 2021-01-08
Supplement: 41598_2020_79137_MOESM1_ESM.pdf [file 41598_2020_79137_MOESM1_ESM.pdf]

# The spreading of the invasive sacred ibis in Italy

**Marco Cucco<sup>1\*</sup>, Gianfranco Alessandria<sup>2</sup>, Marta Bissacco<sup>1</sup>, Franco Carpegna<sup>2</sup>, Mauro Fasola<sup>3</sup>, Alessandra Gagliardi<sup>4</sup>, Laura Gola<sup>5</sup>, Stefano Volponi<sup>6</sup> & Irene Pellegrino<sup>1</sup>**

<sup>1</sup>*University of Piemonte Orientale, DISIT, viale Michel 11, 15100 Alessandria*

<sup>2</sup>*GPSO, Museo di Storia Naturale, 12022 Carmagnola TO*

<sup>3</sup>*University of Pavia, DEES, via Ferrata 6 - 27100 Pavia*

<sup>4</sup>*Istituto OIKOS, via Crescenzago 1, 20134 Milano*

<sup>5</sup>*Parco del Po, piazza Giovanni XXIII 6, 15048 Valenza AL*

<sup>6</sup>*ISPRA, via Ca' Fornacetta 9, 40064 Ozzano Emilia BO*

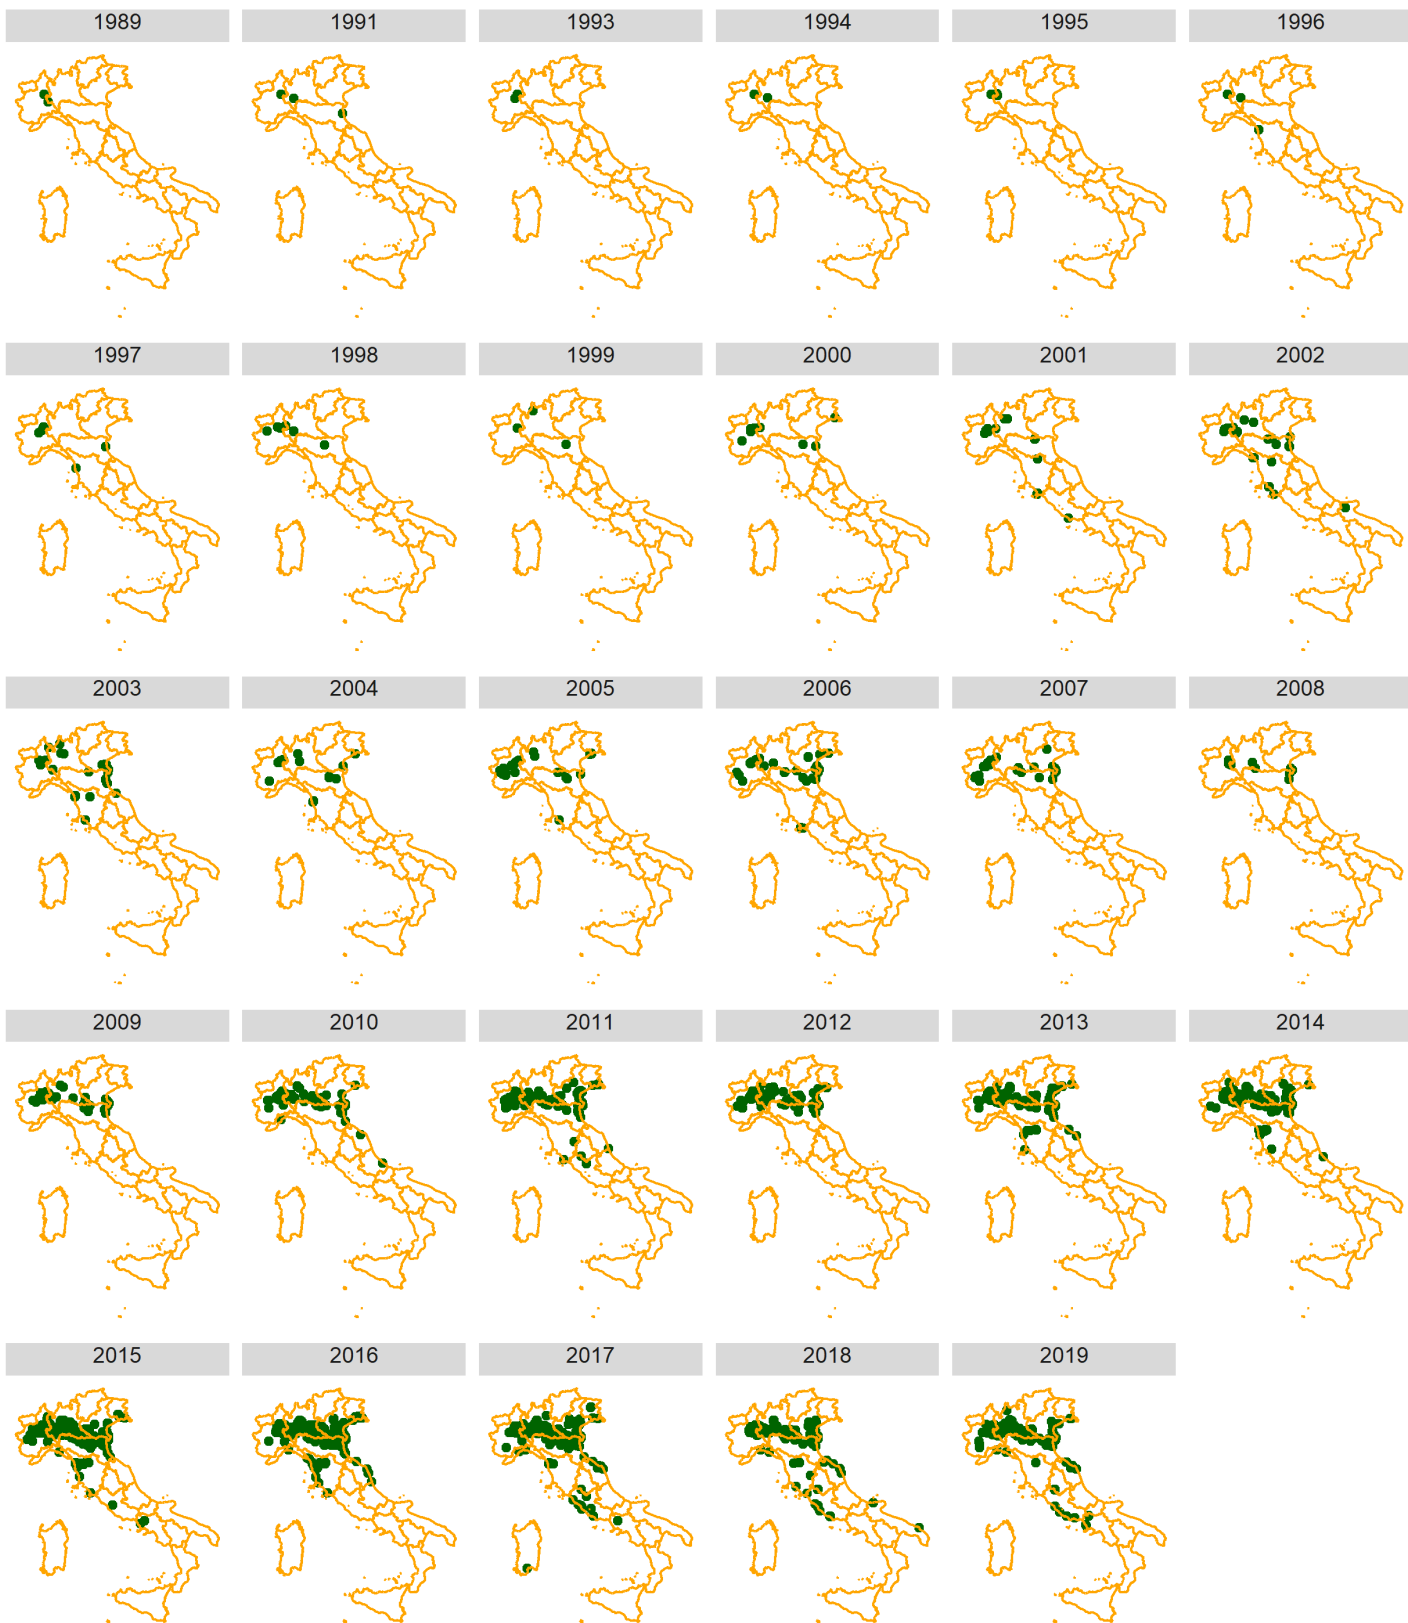

**Supplemental material 1** - Incidental observations: detailed distribution of the Sacred ibis in Italy in each single year along the period 1989-2019.

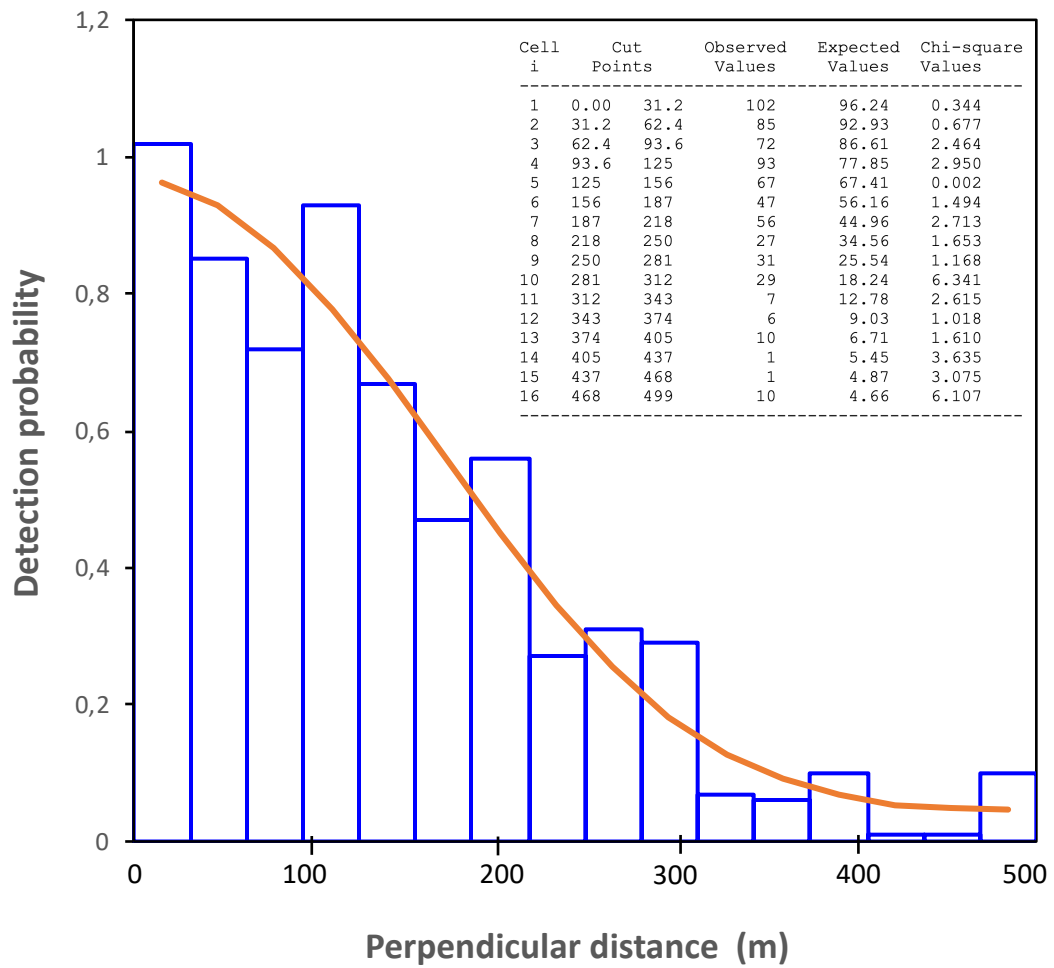

**Supplemental material 2** - Detection probability along census transects in NW Italy.

### SDM NW Italy

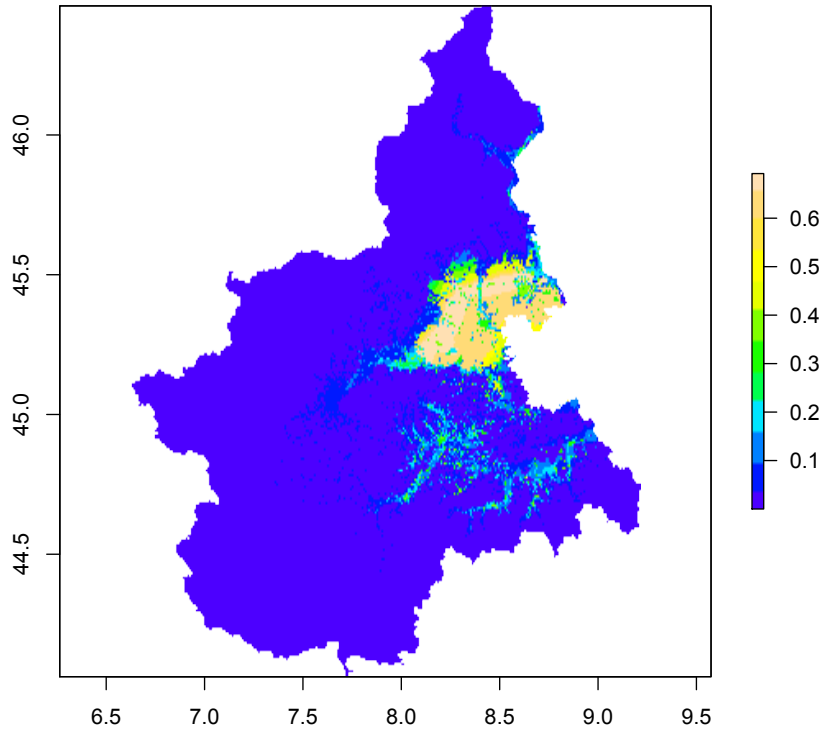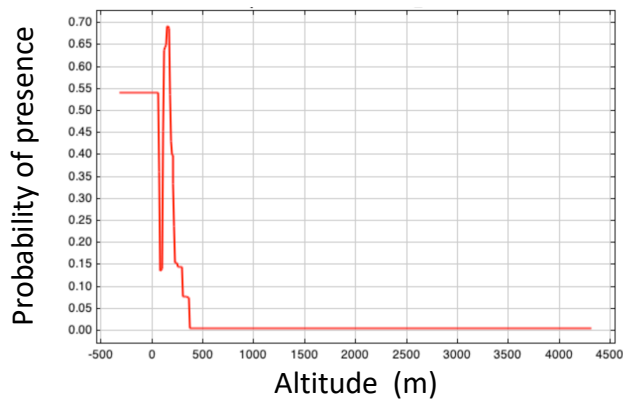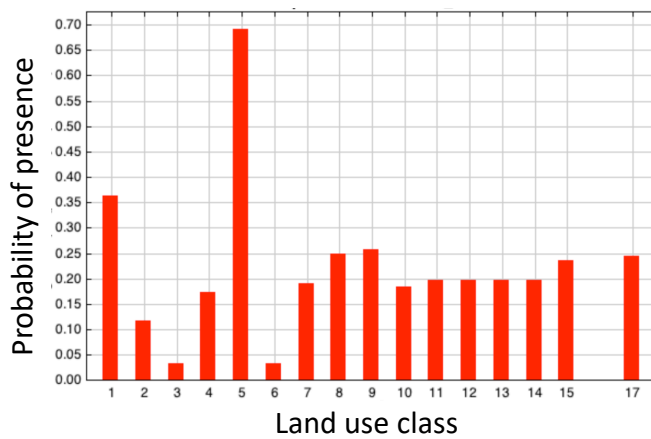

**Supplemental material 3** - Detailed species distribution model in Piedmont, NW Italy. Land use class names are reported in Table 1.

**Supplemental material 4** - Environmental variables utilized for modelling the distribution of the sacred ibis. Collinearity was avoided by removing the variables with inflation factor (VIF) values > 10.

| <b>Variable</b>                            | <b>Code</b> | <b>VIF</b> | <b>VIF retained</b> |
|--------------------------------------------|-------------|------------|---------------------|
| Annual mean temperature                    | Bio1        | 133.558488 |                     |
| Mean diurnal range (max. Temp – min. temp) | Bio2        | 15.460259  |                     |
| Isothermality (Bio2/Bio7) × 100            | Bio3        | 13.025336  | 1.697651            |
| Temperature seasonality (SD × 100)         | Bio4        | 56.537905  | 3.214451            |
| Max temperature of warmest month           | Bio5        | 130.394299 |                     |
| Min temperature of coldest month           | Bio6        | 99.918143  | 7.600086            |
| Temperature annual range (Bio5-Bio6)       | Bio7        | 51.532417  | 4.522596            |
| Mean temperature of wettest quarter        | Bio8        | 5.486069   |                     |
| Mean temperature of driest quarter         | Bio9        | 7.503039   | 6.137563            |
| Mean temperature of warmest quarter        | Bio10       | 148.859108 |                     |
| Mean temperature of coldest quarter        | Bio11       | 148.368207 |                     |
| Annual precipitation                       | Bio12       | 167.411067 |                     |
| Precipitation of wettest month             | Bio13       | 52.476940  | 9.832534            |
| Precipitation of driest month              | Bio14       | 41.577168  |                     |
| Precipitation seasonality (CV)             | Bio15       | 12.238587  | 3.164738            |
| Precipitation of wettest quarter           | Bio16       | 100.225181 |                     |
| Precipitation of driest quarter            | Bio17       | 69.613910  |                     |
| Precipitation of warmest quarter           | Bio18       | 34.839238  | 8.977698            |
| Precipitation of coldest quarter           | Bio19       | 25.771373  | 7.774096            |
